# Supplementary material for: Machine Learning Approach for Candida albicans Fluconazole Resistance Detection Using Matrix-Assisted Laser Desorption/Ionization Time-of-Flight Mass Spectrometry
Source: PubMed Central journal article supplement (PMC6971193; doi:10.3389/fmicb.2019.03000), 2020-01-14
Supplement: Table_1.pdf [file Table_1.pdf]

**Supplementary Table 1 : MALDI-TOF MS settings used for the spectra acquisition**

| <b>Parameters</b>           | <b>Values</b>               |
|-----------------------------|-----------------------------|
| <b>Mode</b>                 | Linear positive             |
| <b>Mass range detection</b> | 2072 – 20000 m/z            |
| <b>Laser frequency</b>      | 60 Hz                       |
| <b>Ion source 1</b>         | 20 kV                       |
| <b>Ion source 2</b>         | 18.10 kV                    |
| <b>Lens</b>                 | 6 kV                        |
| <b>Laser shots</b>          | 600 shots in 100 shot steps |
